# Supplementary material for: Early Postnatal Care Utilization and Associated Factors Among Women Who Give Birth in the Last Six Weeks in Hosanna Town, Southern Ethiopia, 2022
Source: Hindawi journal article supplement (doi:10.1155/2024/1474213), 2024-05-02
Supplement: f1 [file 1474213.f1.pdf]

Table 1. Socio-demographic characteristics of the study participants of early postnatal care utilization in Hadiya Zone, Hosanna town south, Ethiopia, 2022(N=387).

| Variables                                         | Categories          | Frequencies | %    |
|---------------------------------------------------|---------------------|-------------|------|
| <b>Age (n = 387)</b>                              | <25                 | 118         | 30.5 |
|                                                   | 25-35               | 254         | 65.6 |
|                                                   | >35                 | 15          | 3.9  |
| <b>Religion (n = 387)</b>                         | Orthodox            | 106         | 27.4 |
|                                                   | Protestant          | 241         | 62.3 |
|                                                   | Muslim              | 40          | 10.3 |
| <b>Ethnicity (n = 387)</b>                        | Hadiya              | 245         | 63.3 |
|                                                   | Gurage              | 40          | 10.3 |
|                                                   | Kambata             | 51          | 13.2 |
|                                                   | Silte               | 28          | 7.5  |
|                                                   | Amhara              | 23          | 5.9  |
| <b>Educational status of the mother (n = 387)</b> | No formal education | 58          | 15   |
|                                                   | Primary education   | 60          | 15.5 |
|                                                   | Secondary above     | 269         | 69.5 |
| <b>Husband's educational status (n =387)</b>      | No formal education | 73          | 18.9 |
|                                                   | Primary education   | 102         | 26.4 |
|                                                   | Secondary and above | 212         | 54.8 |
| <b>Occupation of the mothers (n = 387)</b>        | Daily laborer       | 58          | 15   |
|                                                   | Housewife           | 86          | 22.2 |
|                                                   | Merchant            | 64          | 16.5 |
|                                                   | Employee            | 179         | 46.3 |
| <b>Husband occupation (n = 387)</b>               | Farmer              | 39          | 10.1 |
|                                                   | Merchant            | 108         | 27.9 |

|                                              |               |     |      |
|----------------------------------------------|---------------|-----|------|
|                                              | Daily laborer | 77  | 19.9 |
|                                              | Employee      | 163 | 42.1 |
| <b>The family income per/month (n = 387)</b> | <1000ETB      | 17  | 4.4  |
|                                              | 1000-1500ETB  | 29  | 7.5  |
|                                              | >1500ETB      | 341 | 88.1 |

Table 2. Obstetric complications of the respondents during the time of delivery and after delivery, who gave birth in the last six weeks in Hosanna town south, Ethiopia, 2022(n= 387).

| Variables                                                              | Categories                    | Frequencies | %    |
|------------------------------------------------------------------------|-------------------------------|-------------|------|
| <b>Have you ever faced any complications during pregnancy (n= 387)</b> | Yes                           | 119         | 30.7 |
|                                                                        | No                            | 268         | 69.3 |
| <b>Complications faced during pregnancy (n = 119)</b>                  | Vaginal bleeding              | 31          | 26.1 |
|                                                                        | Severe headache               | 21          | 17.6 |
|                                                                        | Severe abdominal pain         | 24          | 20.2 |
|                                                                        | Blurring of vision            | 15          | 12.6 |
|                                                                        | Poor fetal movement           | 16          | 13.4 |
|                                                                        | High-grade fever              | 12          | 10.1 |
| <b>Did you have complications at the time of delivery (n = 387)</b>    | Yes                           | 129         | 33.3 |
|                                                                        | No                            | 258         | 66.7 |
| <b>Complications developed at the time of delivery (m = 129)</b>       | Labor lasting a long time     | 59          | 45.7 |
|                                                                        | Fetal distress                | 45          | 34.9 |
|                                                                        | PIH (pre-eclampsia/eclampsia) | 25          | 19.4 |
| <b>Have you developed a complication after delivery (n = 387)</b>      | Yes                           | 100         | 25.8 |
|                                                                        | No                            | 287         | 74.2 |

| <b>Complications developed after delivery (n = 100)</b> | Heavy bleeding        | 32 | 32.0 |
|---------------------------------------------------------|-----------------------|----|------|
|                                                         | High-grade fever      | 7  | 7.0  |
|                                                         | Severe headache       | 20 | 20.0 |
|                                                         | Blurring of vision    | 24 | 24.0 |
|                                                         | Severe abdominal pain | 17 | 17.0 |

Table 3. Health care provider and facility factors of the respondent in Hadiya Zone, Hosanna town southern, Ethiopia, 2022(n= 387).

| Variables                                                            | Categories               | Frequencies | %    |
|----------------------------------------------------------------------|--------------------------|-------------|------|
| <b>Time to reach the health facility (n = 387)</b>                   | <30 minute               | 187         | 48.3 |
|                                                                      | 30-60 minute             | 109         | 28.2 |
|                                                                      | >=1hr                    | 91          | 23.5 |
| <b>Place of birth (n= 387)</b>                                       | Health post              | 53          | 13.7 |
|                                                                      | Private clinic           | 93          | 24   |
|                                                                      | Health center            | 111         | 28.7 |
|                                                                      | Gov.t hospital           | 130         | 33.6 |
| <b>Birth attended by (n = 387)</b>                                   | Health professionals     | 334         | 86.3 |
|                                                                      | Health extension workers | 53          | 13.7 |
| <b>Appointment to the mother by the birth attendant (n = 373)</b>    | Yes                      | 358         | 97.9 |
|                                                                      | No                       | 15          | 2.1  |
| <b>Did somebody visit you at your home after delivery? (n = 387)</b> | Yes                      | 301         | 77.8 |
|                                                                      | No                       | 86          | 22.2 |
| <b>The mother visited after birth by (n =</b>                        | Health professionals     | 124         | 40.9 |

|             |                          |     |      |
|-------------|--------------------------|-----|------|
| <b>303)</b> | Health extension workers | 179 | 59.1 |
|-------------|--------------------------|-----|------|

Table 4. Awareness of the mothers and early postnatal care utilization in Hadiya zone, Hosanna town South, Ethiopia, 2022(n= 387).

| Variables                                                              | Categories                              | Frequencies | %    |
|------------------------------------------------------------------------|-----------------------------------------|-------------|------|
| <b>Awareness of the mothers on EPNCU (n = 387)</b>                     | Yes                                     | 191         | 49.4 |
|                                                                        | No                                      | 196         | 50.6 |
| <b>What are the types of early postnatal care services provided? *</b> | Physical examination of the mother      | 117         | 30.2 |
|                                                                        | Physical examination of the baby        | 102         | 26.4 |
|                                                                        | Provision of family planning            | 84          | 21.7 |
|                                                                        | Provision of immunization               | 53          | 13.7 |
|                                                                        | Advising on danger signs after delivery | 101         | 26.1 |
|                                                                        | Advising on nutrition                   | 58          | 15   |
|                                                                        | Advising on hygiene                     | 96          | 24.8 |
|                                                                        | Advising on breastfeeding               | 148         | 38.2 |
| <b>Obstacles to utilizing EPNCU*</b>                                   | Cultural not recommended                | 172         | 44.5 |
|                                                                        | Waiting for falling off baby's cord     | 38          | 9.8  |
|                                                                        | To have enough energy                   | 2           | 0.5  |
|                                                                        | Pregnancy was unplanned                 | 2           | 0.5  |
|                                                                        | Lack of time                            | 110         | 28.4 |
|                                                                        | Lack of guardians for my children       | 57          | 14.7 |
|                                                                        | Waiting for the service kills the time  | 158         | 40.8 |

Lack of information or advise

139

35.9

*\*more than one response*

Table 5. Results of bivariate and multivariate logistic regression analysis conducted on mothers who had children within the previous six weeks in Hadiya Zone, Hosanna Town South, Ethiopia, 2022(n=387).

| Characteristics                            | Categories        | EPNCU |     | COR 95% CI          | AOR 95% CI                 | p-values         |
|--------------------------------------------|-------------------|-------|-----|---------------------|----------------------------|------------------|
|                                            |                   | Yes   | No  |                     |                            |                  |
| <b>ANC follow-up</b>                       | Yes               | 81    | 173 | 2.8(1.616, 4.882)   | <b>2.132(1.110, 4.096)</b> | <b>0.023</b>     |
|                                            | No                | 19    | 114 | 1                   | 1                          |                  |
| <b>Occupation of the mothers</b>           | Daily laborer     | 7     | 51  | 0.326(0.139, 0.765) | 0.431(0.159, 1.169)        | 0.098            |
|                                            | Housewife         | 21    | 65  | 0.768(0.427, 1.382) | 0.854(0.416, 1.753)        | 0.668            |
|                                            | Merchant          | 19    | 45  | 1.004(0.537, 1.875) | 0.959(0.433, 2.128)        | 0.918            |
|                                            | Civil servant     | 53    | 126 | 1                   | 1                          |                  |
| <b>Husband educational level</b>           | No formal         | 4     | 69  | 0.090(0.032, 0.256) | <b>0.050(0.016, 0.158)</b> | <b>&lt;0.001</b> |
|                                            | Primary           | 13    | 89  | 0.227(0.119, 0.432) | <b>0.146(0.065, 0.315)</b> | <b>&lt;0.001</b> |
|                                            | Secondary & above | 83    | 129 | 1                   | 1                          |                  |
| <b>Stay an hour in the health facility</b> | <24 hours         | 32    | 152 | 0.4(0.255, 0.666)   | <b>0.299(0.163, 0.548)</b> | <b>&lt;0.001</b> |
|                                            | ≥24 hours         | 70    | 133 | 1                   | 1                          |                  |
| <b>Parity</b>                              | One               | 24    | 46  | 2.4(1.266, 4.384)   | 2.153(0.991, 4.679)        | 0.053            |
|                                            | Two               | 43    | 92  | 2.11(1.251, 3.559)  | 1.854(0.980, 3.507)        | 0.058            |
|                                            | Three and above   | 33    | 149 | 1                   | 1                          |                  |

---

|                                                     |     |    |     |                     |                            |                  |
|-----------------------------------------------------|-----|----|-----|---------------------|----------------------------|------------------|
| <b>Do you have<br/>information<br/>about EPNCU?</b> | Yes | 71 | 120 | 3.407(2.084, 5.570) | <b>3.082(1.722, 5.520)</b> | <b>&lt;0.001</b> |
|                                                     | No  | 29 | 167 | 1                   | 1                          |                  |

---
